# Supplementary material
Source: PubMed Central journal article supplement (PMC3149707)
Supplement: mabs0303_0264SD1.pdf [file mabs0303_0264SD1.pdf]

| <b>Supplementary Table: CDR3 sequences of randomly selected library antibody clones</b> |            |                       |                     |
|-----------------------------------------------------------------------------------------|------------|-----------------------|---------------------|
| Clone                                                                                   | Res. 52 VH | VH                    | VL                  |
|                                                                                         |            | 95 - 100              | 91 - 96             |
| <b>Philo 1 library</b>                                                                  |            |                       |                     |
| DPL-16_1                                                                                | D          | AK <u>CCLWG</u> --FD  | SS <u>FNTRSP</u> VV |
| DPL-16_2                                                                                | D          | AK <u>RRLRIEL</u> -FD | SS <u>GGPMLR</u> VV |
| DPL-16_3                                                                                | D          | AK <u>PNRL</u> ---FD  | SS <u>TPPLWR</u> VV |
| DPK-22_1                                                                                | D          | AK <u>SEERRV</u> -FD  | QQ <u>MRGRPH</u> TF |
| DPK-22_2                                                                                | D          | AK <u>QSYQRLT</u> FD  | QQ <u>SRGKPI</u> TF |
| DPK-22_3                                                                                | D          | AK <u>HDLRAS</u> -FD  | QQ <u>VGTSPQ</u> TF |
| DPL-16_1                                                                                | K          | AK <u>LLNGNL</u> -FD  | SS <u>PEMLRR</u> VV |
| DPL-16_2                                                                                | K          | AK <u>TKADKWIF</u> D  | SS <u>YMGVVP</u> VV |
| DPL-16_3                                                                                | K          | AK <u>SPCPG</u> --FD  | SS <u>APGGIE</u> VV |
| DPK-22_1                                                                                | K          | AK <u>RGYNGNM</u> FD  | QQ <u>AGSAPL</u> TF |
| DPK-22_2                                                                                | K          | AK <u>LPSGL</u> --FD  | QQ <u>WGTVPY</u> TF |
| DPK-22_3                                                                                | K          | AK <u>PPAPG</u> --FD  | QQ <u>KQGTPV</u> TF |
| <b>Philo 2 library</b>                                                                  |            |                       |                     |
| DPL-16_1                                                                                | N          | AK <u>YMTVIDM</u> FD  | SS <u>QPPPKH</u> VV |
| DPL-16_2                                                                                | N          | AK <u>PSAR</u> ---FD  | SS <u>TEPRGF</u> VV |
| DPL-16_3                                                                                | N          | AK <u>LVPKRF</u> -FD  | SS <u>GGPVTG</u> VV |
| DPK-22_1                                                                                | N          | AK <u>PALPGF</u> -FD  | QQ <u>QPGGPW</u> TF |
| DPK-22_2                                                                                | N          | AK <u>APAFV</u> --FD  | QQ <u>QGYRPM</u> TF |
| DPK-22_3                                                                                | N          | AK <u>LSARRG</u> FD   | QQ <u>RRGRPY</u> TF |
| DPL-16_1                                                                                | Y          | AK <u>ESTFL</u> --FD  | SS <u>PTLWYY</u> VV |
| DPL-16_2                                                                                | Y          | AK <u>LSETR</u> --FD  | SS <u>PRPQEM</u> VV |
| DPK-22_1                                                                                | Y          | AK <u>GGPR</u> ---FD  | QQ <u>MGDIP</u> TF  |
| DPK-22_2                                                                                | Y          | AK <u>YNRSRP</u> -FD  | QQ <u>WFGSPV</u> TF |
| DPK-22_3                                                                                | Y          | AK <u>ACSP</u> ---FD  | QQ <u>AMGNPQ</u> TF |
